# Supplementary material
Source: publisher figshare collection journal article supplement (https://frontiersin.figshare.com/ndownloader/files/13169366)
Supplement: Supplementary file [file 13169366]

VGLUT2 functions as a differential marker for  
hippocampal output neurons

Christian Wozny<sup>1,2,7,\*</sup>, Prateep Beed<sup>2,3,7</sup>, Noam Nitzan<sup>2</sup>, Yona Pössnecker<sup>2</sup>,  
Benjamin R. Rost<sup>2,4</sup>, and Dietmar Schmitz<sup>2,4,5,6</sup>

<sup>1</sup>Strathclyde Institute of Pharmacy and Biomedical Sciences, University of Strathclyde, 161 Cathedral Street, Glasgow, G4 0RE, UK

<sup>2</sup>Charité – Universitätsmedizin Berlin, Neuroscience Research Center, Charitéplatz 1, 10117 Berlin, Germany

<sup>3</sup>Berlin Institute of Health, Anna-Louisa-Karsch-Str. 2, 10178 Berlin, Germany

<sup>4</sup>DZNE – German Center for Neurodegenerative Diseases, Charité – Universitätsmedizin, Charitéplatz 1, 10117 Berlin, Germany

<sup>5</sup>NeuroCure – Cluster of Excellence, Charité – Universitätsmedizin Berlin, 10117 Berlin, Germany

<sup>6</sup>Einstein Center for Neurosciences, 10117 Berlin, Germany

<sup>7</sup>These authors contribute equally to this study.

\*For Correspondence: christian.wozny@strath.ac.uk

## Supplementary Figure 1: Gene expression

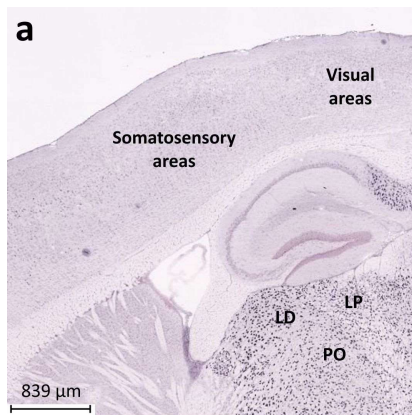

Gene expression of Gene Slc17a6 (solute carrier family 17 (sodium-dependent inorganic phosphate cotransporter), member 6, alias VGLUT2 – vesicular glutamate transporter). In-situ hybridization modified from the Allen Brain Atlas repository (<http://mouse.brain-map.org/gene/show/80230>). Sagittal slice.

**a**, No expression of VGLUT2 in the visual and the somatosensory areas.

**b**, Enlargement of **a**. Strong expression in the subiculum (SUB), but no labeled neurons in area CA1 of the hippocampus. Abbreviations: LD: Lateral dorsal nucleus of the thalamus; LP: Lateral dorsal nucleus of the thalamus (LP); PO: Posterior complex of the thalamus.

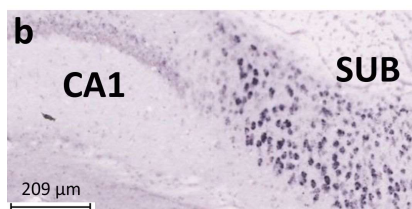

Supplementary Figure S2: Intrinsic electrophysiological properties of subicular burst- (BURST) and regular-firing (REG) cells

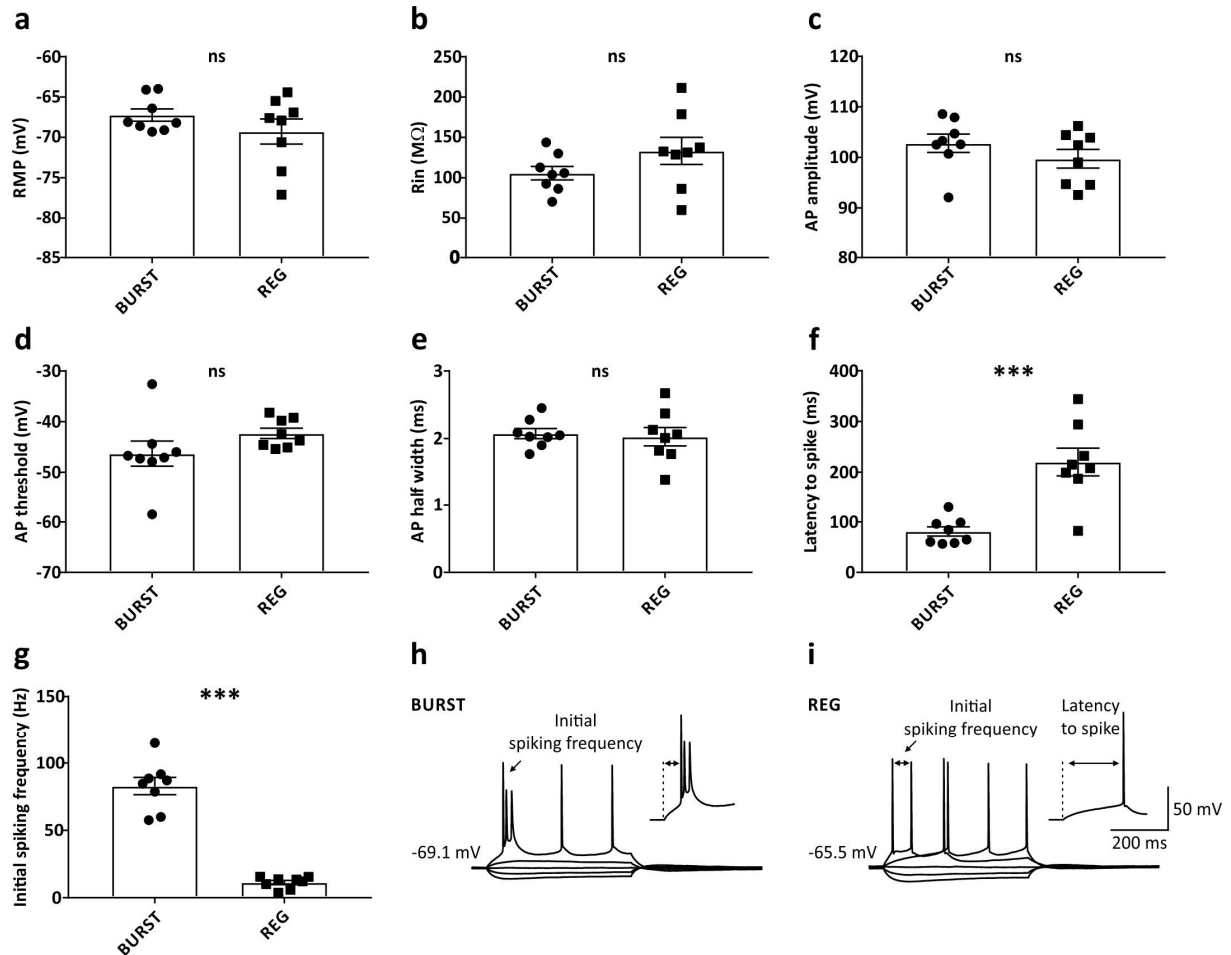

**a - g**, Eight randomly selected neurons were analysed for both cell types (BURST and REG). **h** and **i**, Example traces; current injected in 40 pA steps from -80 pA to 80 pA.

### Supplementary Figure S3: Single confocal plan

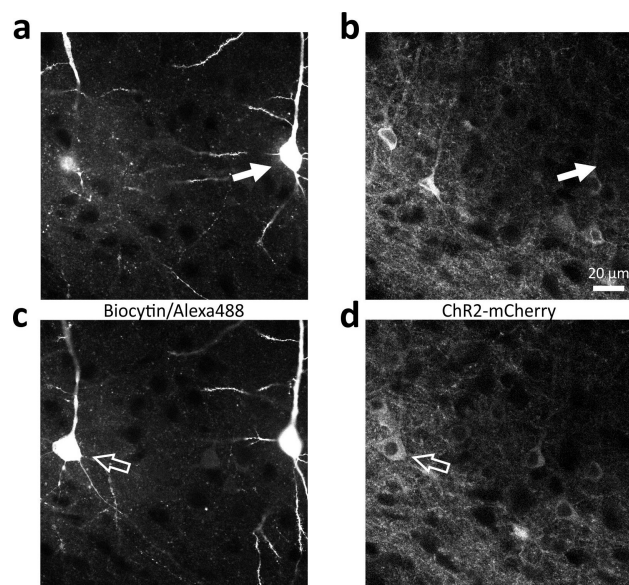

**a**, Single confocal plan (1  $\mu$ m) of two biocytin-filled subicular pyramidal neurons (Alexa 488). **b**, Single confocal plan of ChR2-mCherry-labelled infected neurons. Please note that the biocytin-filled neuron is negative for mCherry (regular firing neuron; closed arrow). **c**, Subicular burst-firing cell, which is positive for mCherry (open arrow; **d**).
